# Supplementary material for: Synthesis, photoluminescence, catalysis and multilayer film assembly of an ethynylpyridine platinum compound
Source: Royal Society of Chemistry journal article supplement (doi:10.1039/c0ce00382d), 2010-10-21
Supplement: c0ce00382d.pdf [file c0ce00382d.pdf]

## Synthesis, Photoluminescence, Catalysis and Multilayer Films Assembly of Ethynylpyridine Platinum Compound

Xing Li,<sup>a\*</sup> Mei-Qin Zha,<sup>a</sup> Shui-Ying Gao,<sup>c\*</sup> Paul J. Low,<sup>b\*</sup> Yuan-Zhao Wu<sup>a</sup>, Ning  
Gan<sup>a</sup> and Rong Cao<sup>c</sup>

### Supporting Information

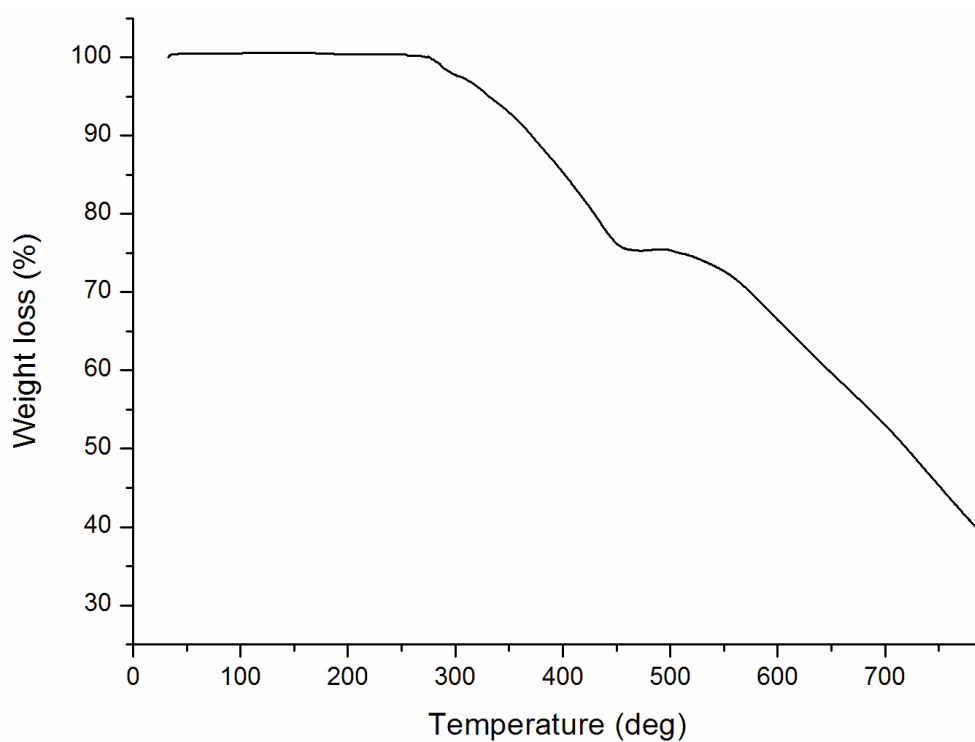

**Figure S1.** The thermogravimetric analysis pattern for **1**.

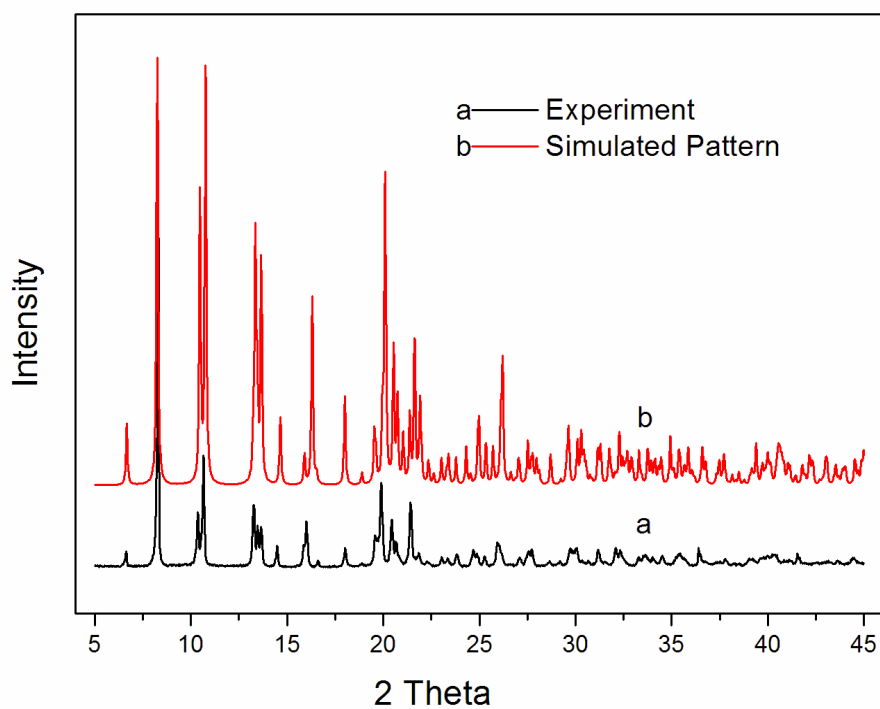

**Figure S2.** The experimental and the simulated XRD patterns for **1**.

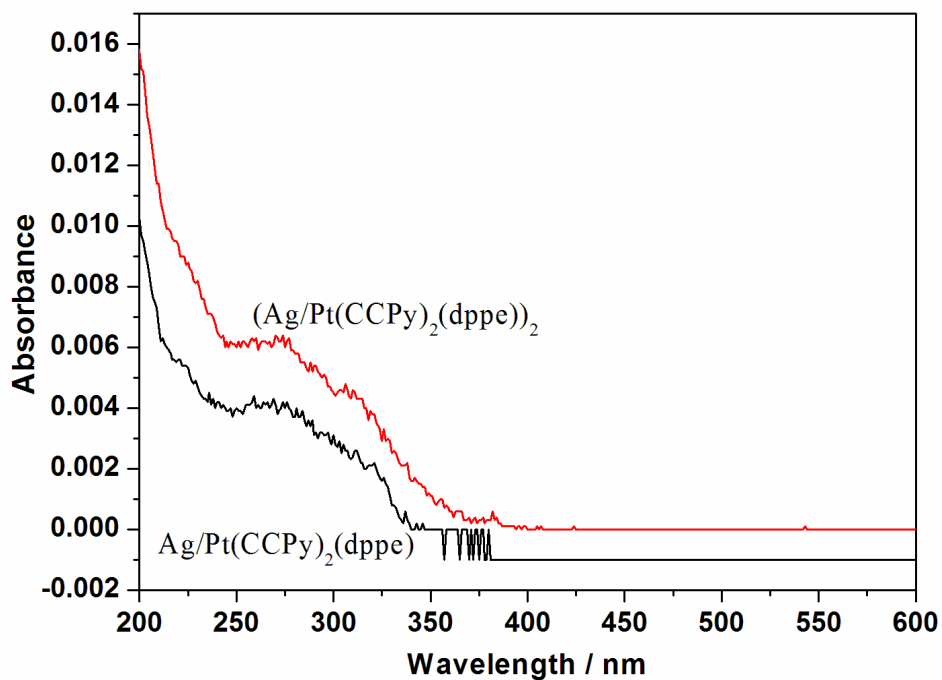

**Figure S3.** UV-vis spectra of the multilayer film  $[PEI-(Ag^+/Pt(CCPy)_2(dppe))_n]$ .
